# Supplementary material
Source: PubMed Central journal article supplement (PMC4143138)
Supplement: NIHMS76786-supplement-01.pdf [file NIHMS76786-supplement-01.pdf]

# Supplementary Material

for the manuscript entitled

## A mild, catalyst-free synthesis of 2-aminopyridines

Bhaskar Poola, Wonken Choung and Michael H. Nantz

*Department of Chemistry, University of Louisville, Louisville, KY and  
Department of Chemistry, University of California, Davis, CA*

submitted to *Tetrahedron*

Spectral data for **3a-k** (prepared using Method A unless otherwise indicated)

|                                                                   |    |
|-------------------------------------------------------------------|----|
| Tabulated data.....                                               | 2  |
| <sup>1</sup> H and <sup>13</sup> C NMR spectra.....               | 6  |
| Monitoring the formation of <b>3c</b> by <sup>1</sup> H NMR ..... | 23 |
| Comparison of present method with previous syntheses.....         | 24 |

## Spectral Data for Compounds 3a-k

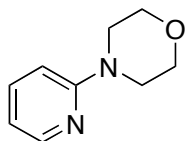

**4-Pyridin-2-yl-morpholine (3a)**

$^1\text{H}$  NMR, 400 MHz (DMSO- $d^6$ )  $\delta$  8.19 (d,  $J$  = 4.8 Hz, 1H), 7.51-7.46 (m, 1H), 6.66-6.62 (m, 2H), 3.81 (t,  $J$  = 8.0 Hz, 4H), 3.49 (t,  $J$  = 8.0 Hz, 4H)

Lit.: Grasa, G. A.; Viciu, M. S.; Huang, J.; Nolan, S. P. *J. Org. Chem.* **2001**, *66*, 7729.

---

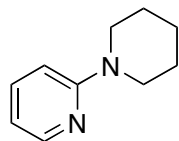

**N-Pyridin-2-yl-piperidine (3b)**

$^1\text{H}$  NMR, 500 MHz (CDCl<sub>3</sub>)  $\delta$  8.11 (d,  $J$  = 6.0 Hz, 1H), 7.36 (t,  $J$  = 7.0 Hz, 1H), 6.57 (d,  $J$  = 8.5 Hz, 1H), 6.48 (t,  $J$  = 6.5 Hz, 1H), 3.46 (m, 4H), 1.58 (m, 6H).

$^{13}\text{C}$  NMR (CDCl<sub>3</sub>)  $\delta$  159.7, 147.9, 137.2, 112.4, 107.1, 46.3, 25.5, 24.7

Lit.: Pasumansky, L.; Hernandez, A. R.; Gamsey, S.; Goralski, C. T.; Singaram, B. *Tetrahedron Lett.* **2004**, *45*, 6417.

---

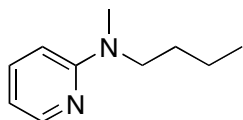

**N-Butyl-N-methyl-pyridin-2-yl-amine (3c)**

$^1\text{H}$  NMR, 400 MHz (CDCl<sub>3</sub>)  $\delta$  8.02 (d,  $J$  = 4.8 Hz, 1H), 7.41 (t,  $J$  = 9.6 Hz, 1H), 6.53 (d,  $J$  = 8.8 Hz, 1H), 6.46 (t,  $J$  = 6.4 Hz, 1H), 3.44 (t,  $J$  = 8.8 Hz, 2H), 2.92 (s, 3H), 1.45 (m, 2H), 2.24 (m, 2H), 0.87 (t,  $J$  = 7.2 Hz, 3H)

$^{13}\text{C}$  NMR (CDCl<sub>3</sub>)  $\delta$  159.0, 148.2, 137.2, 111.2, 105.8, 50.2, 36.5, 29.6, 20.5, 14.3

Lit.: Strekowski, L.; Dworniczak, M; Kowalewski, A. *Polish J. Chem.* **1980**, *54*, 1557.

---

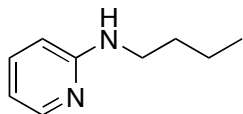

**N-Butyl-pyridin-2-yl-amine (3d)**

$^1\text{H}$  NMR, 400 MHz (CDCl<sub>3</sub>)  $\delta$  8.07 (d,  $J$  = 4.8 Hz, 1H), 7.43-7.27 (m, 1H), 6.54 (t,  $J$  = 5.2 Hz, 1H), 6.36 (d,  $J$  = 8.4 Hz, 1H), 4.50 (br s, 1H), 3.27-3.22 (m, 2H), 1.64-1.56 (m, 2H), 1.48-1.38 (m, 2H), 0.95 (t,  $J$  = 7.2 Hz, 3H)

$^{13}\text{C}$  NMR ( $\text{CDCl}_3$ )  $\delta$  148.4, 137.6, 112.8, 106.5, 94.6, 42.2, 31.9, 20.4, 14.1

Lit.: Okano, K.; Tokuyama, H.; Fukuyama, T. *Organic Lett.*, **2003**, *5*, 4987.

---

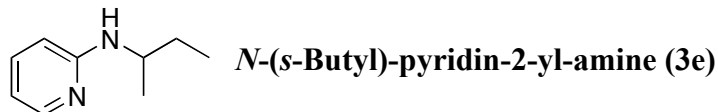

$^1\text{H}$  NMR, 400 MHz ( $\text{CDCl}_3$ )  $\delta$  8.06 (d,  $J = 5.2$  Hz, 1H), 7.39 (t,  $J = 6.8$  Hz, 1H), 6.52 (t,  $J = 6.0$  Hz, 1H), 6.34 (d,  $J = 8.4$  Hz, 1H), 4.39 (br s, 1H), 3.67 (m, 1H), 1.57 (m, 2H), 1.19 (d,  $J = 6.4$  Hz, 3H), 0.96 (t, 7.6 Hz, 3H)

$^{13}\text{C}$  NMR ( $\text{CDCl}_3$ )  $\delta$  158.6, 148.5, 137.6, 112.5, 106.8, 48.7, 30.0, 20.6, 10.6

Lit.: Abarghaz, M.; Kerbal, A.; Bourguignon, J-J. *Tetrahedron Lett.* **1995**, *36*, 6463.

---

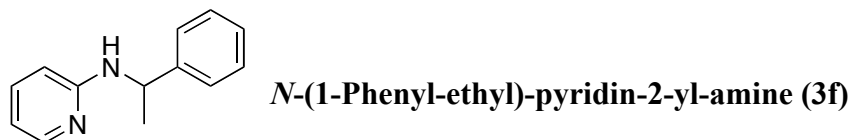

$^1\text{H}$  NMR, 400 MHz ( $\text{DMSO } d_6$ )  $\delta$  8.07-8.05 (m, 1H), 7.38-7.20 (m, 6H), 6.53-6.50 (m, 1H), 6.18 (dd,  $J = 0.8, 7.6$  Hz, 1H), 5.18 (br s, 1H), 4.71 (m, 1H), 1.53 (d,  $J = 6.8$  Hz, 3H)

$^{13}\text{C}$  NMR ( $\text{DMSO } d_6$ )  $\delta$  158.4, 148.4, 145.0, 137.7, 128.9, 127.2, 126.1, 113.2, 106.9, 52.2, 24.7

Lit.: Pasumansky, L.; Hernandez, A. R.; Gamsey, S.; Goralski, C. T.; Singaram, B. *Tetrahedron Lett.* **2004**, *45*, 6417.

---

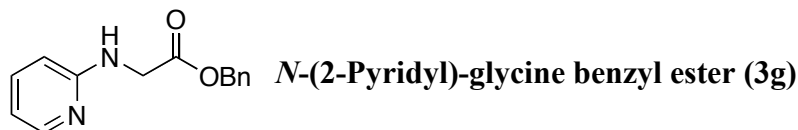

$^1\text{H}$  NMR, 500 MHz ( $\text{CDCl}_3$ )  $\delta$  8.08 (d,  $J = 4.5$  Hz, 1H), 7.42-7.25 (m, 6H), 6.61 (m, 1H), 6.45 (d,  $J = 8.5$  Hz, 1H), 5.20 (s, 2H), 5.01 (br. s, NH), 4.19 (d,  $J = 5.0$  Hz, 2H)

$^{13}\text{C}$  NMR ( $\text{CDCl}_3$ )  $\delta$  171.4, 157.7, 147.9, 137.7, 135.7, 128.8, 128.6, 128.4, 113.9, 108.7, 67.1, 44.0

---

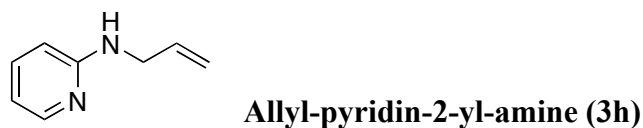

$^1\text{H}$  NMR (500 MHz,  $\text{CDCl}_3$ )  $\delta$  8.03-8.04 (m, 1H), 7.36 (t,  $J = 8$  Hz, 1H), 6.50-6.54 (m, 1H), 6.34 (d,  $J = 8$  Hz, 1H), 5.80-6.0 (m, 1H), 5.22 (d,  $J = 17$  Hz, 1H), 5.10 (d,  $J = 10.5$  Hz, 1H), 4.82 (br s, 1H), 3.88 (s, 2H)

$^{13}\text{C}$  NMR (125 MHz,  $\text{CDCl}_3$ )  $\delta$  158.6, 148.0, 137.3, 135.0, 115.8, 112.8, 106.6, 44.5

Lit.: Blomberg, D.; Brickmann, K.; Kihlberg, J. *Tetrahedron* **2006**, *62*, 10937.

---

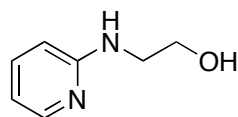

**2-(Pyridin-2-ylamino)ethanol (3i)**

$^1\text{H}$  NMR (500 MHz,  $\text{CDCl}_3$ )  $\delta$  7.92 (br s, 1H), 7.25-7.36 (m, 1H), 6.47 (d,  $J = 4$  Hz, 1H), 6.33-6.37 (m, 1H), 5.25 (br, 1H), 5.06 (br s, 1H), 3.69-3.72 (m, 2H), 3.37 (br s, 1H)

$^{13}\text{C}$  NMR (125 MHz,  $\text{CDCl}_3$ )  $\delta$  158.7, 147.1, 137.5, 112.8, 108.2, 62.8, 45.1

Lit.: Blomberg, D.; Brickmann, K.; Kihlberg, J. *Tetrahedron* **2006**, *62*, 10937.

---

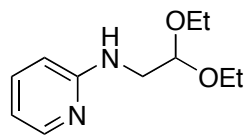

**N-(2-Pyridyl)aminoacetaldehyde diethyl acetal (3j)**

$^1\text{H}$  NMR (500 MHz,  $\text{CDCl}_3$ )  $\delta$  8.03 (br s, 1H), 7.38-7.30 (m, 1H), 6.53-6.50 (m, 1H), 6.36 (d,  $J = 8.5$  Hz, 1H), 4.68 (br s, 1H), 4.62-4.58 (m, 1H), 3.70-3.65 (m, 2H), 3.54-3.50 (m, 2H), 3.43-3.40 (m, 2H), 1.19-1.15 (m, 6H)

$^{13}\text{C}$  NMR (125 MHz,  $\text{CDCl}_3$ )  $\delta$  158.4, 147.9, 137.1, 112.8, 107.3, 101.0, 62.4, 44.3, 15.2

Lit.: Ziegler, R.; Ho, B.; Castagnoli, N. *J. Med. Chem.* **1981**, *24*, 1133.

---

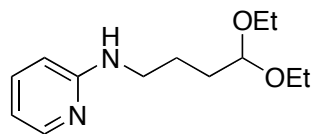

**4-N-(2-Pyridyl)amino-butylaldehyde diethyl acetal (3k)**

$^1\text{H}$  NMR (500 MHz,  $\text{CDCl}_3$ )  $\delta$  8.0-7.98 (m, 1H), 7.31 (t,  $J = 8$  Hz, 1H), 6.46 (t,  $J = 6$  Hz, 1H), 6.29 (d,  $J = 8.5$  Hz, 1H), 4.70 (br s, 1H), 4.45-4.43 (m, 1H), 3.60-3.50 (m, 2H), 3.45-3.40 (m, 2H), 3.24-3.21 (m, 2H), 1.65-1.64 (m, 4H), 1.15-1.10 (m, 6H)

$^{13}\text{C}$  NMR (125 MHz,  $\text{CDCl}_3$ )  $\delta$  158.7, 147.9, 137.2, 112.4, 106.4, 102.5, 61.0, 41.8, 31.0, 24.6, 15.2

---



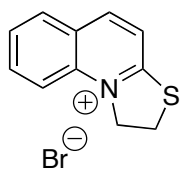

**1,2-Dihydrothiazolo[3,2-a]quinolinium bromide (7)**

$^1\text{H}$  NMR (500 MHz, DMSO- $d_6$ )  $\delta$  8.97-8.85 (m, 1H), 8.38-8.28 (m, 1H), 8.25-8.05 (m, 3H), 7.92-7.80 (m, 1H), 5.41-5.30 (m, 2H), 4.05-3.90 (m, 2H)

$^{13}\text{C}$  NMR (125 MHz, DMSO- $d_6$ )  $\delta$  165.3, 144.3, 137.6, 134.7, 130.0, 128.0, 126.0, 118.5, 56.8, 29.2

---

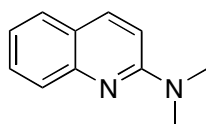

**2-Dimethylaminoquinoline (8a)**

$^1\text{H}$  NMR (500 MHz, CDCl<sub>3</sub>)  $\delta$  7.85 (d, J = 9 Hz, 1H), 7.73 (d, J = 8 Hz, 1H), 7.58 (d, J = 8 Hz, 1H), 7.53 (t, J = 7.7 Hz, 1H), 7.19 (t, J = 7.5 Hz, 1H), 6.88 (d, J = 9 Hz, 1H), 3.23 (s, 6H)

$^{13}\text{C}$  NMR (500 MHz, CDCl<sub>3</sub>)  $\delta$  157.5, 148.0, 137.1, 129.4, 127.2, 126.2, 122.3, 121.6, 109.0, 38.0

Lit.: Gupton, J. T.; Idoux, J. P.; Baker, G.; Colon, C.; Crews, D.; Jurss, C. D.; Rampi, R. C. *J. Org. Chem.* **1983**, *48*, 2933.

---

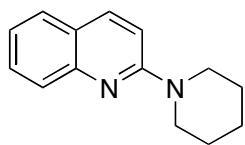

**2-Piperidinylquinoline (8b)**

$^1\text{H}$  NMR (500 MHz, CDCl<sub>3</sub>)  $\delta$  7.84 (d, J = 9 Hz, 1H), 7.73 (d, J = 8.5 Hz, 1H), 7.58 (d, J = 8 Hz, 1H), 7.54 (t, J = 7.7 Hz, 1H), 7.21 (t, J = 7.5 Hz, 1H), 6.98 (d, J = 9 Hz, 1H), 3.80-3.70 (m, 4H), 1.69 (s, 6H)

$^{13}\text{C}$  NMR (125 MHz, CDCl<sub>3</sub>)  $\delta$  157.5, 148.0, 137.1, 129.2, 127.0, 126.4, 122.7, 121.8, 109.7, 46.1, 25.7, 24.8

---

# $^1\text{H}$ and $^{13}\text{C}$ NMR Spectra of Dihydrothiazolopyridinium Bromide 2

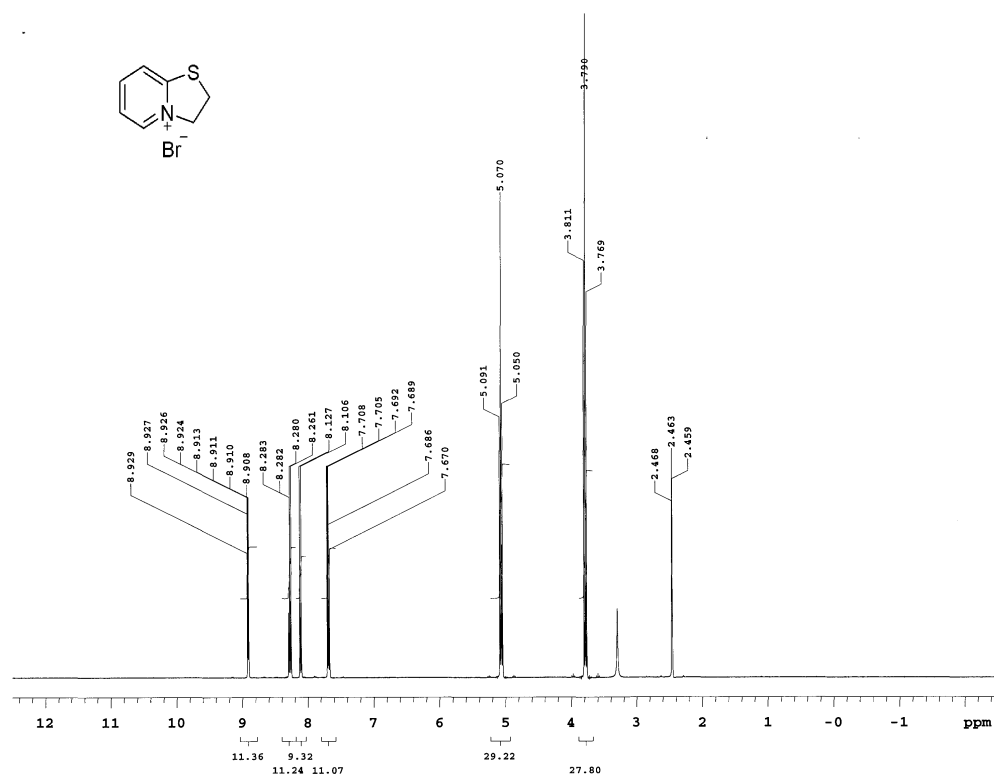

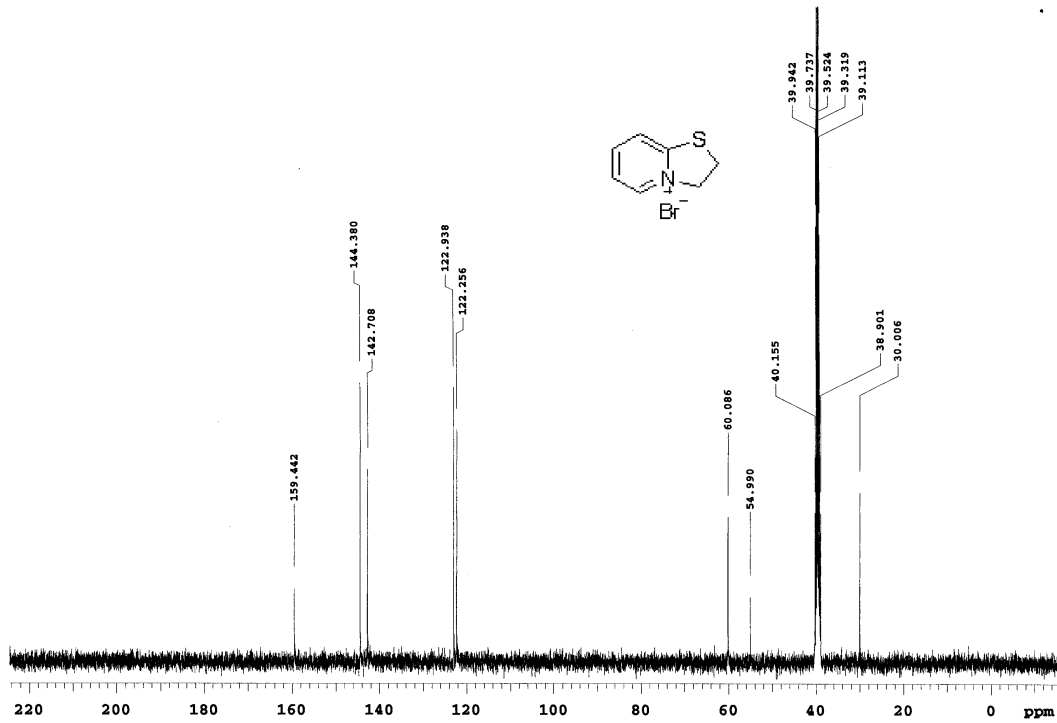

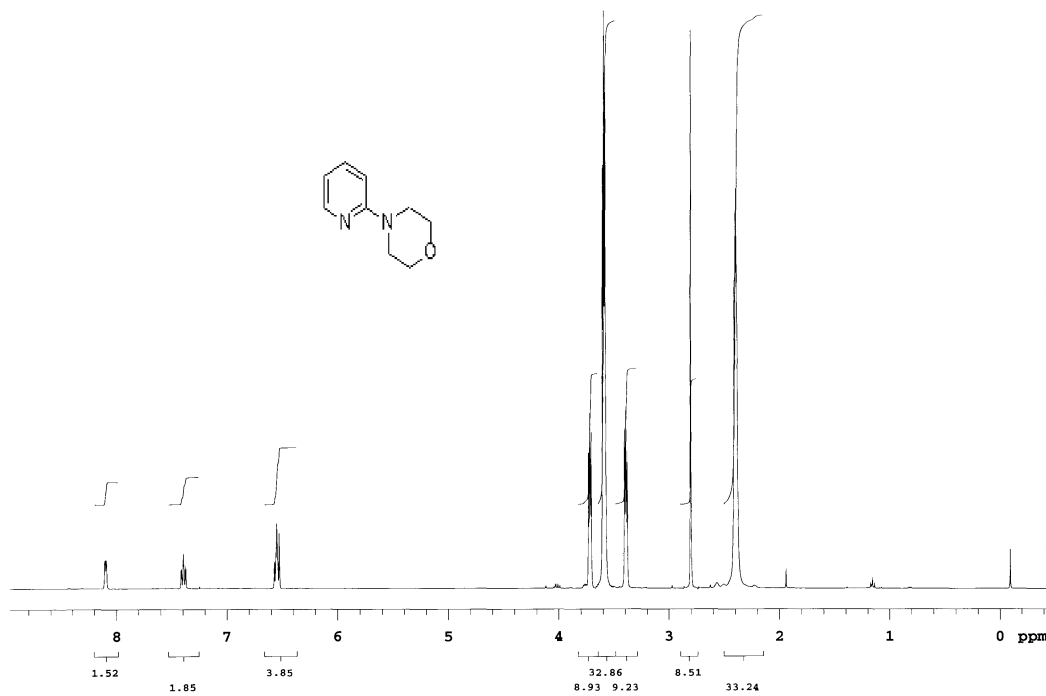

<sup>1</sup>H NMR spectrum of 4-pyridin-2-yl-morpholine (3a)

# $^1\text{H}$ and $^{13}\text{C}$ nmr spectra of 3b prepared in $\text{H}_2\text{O}$

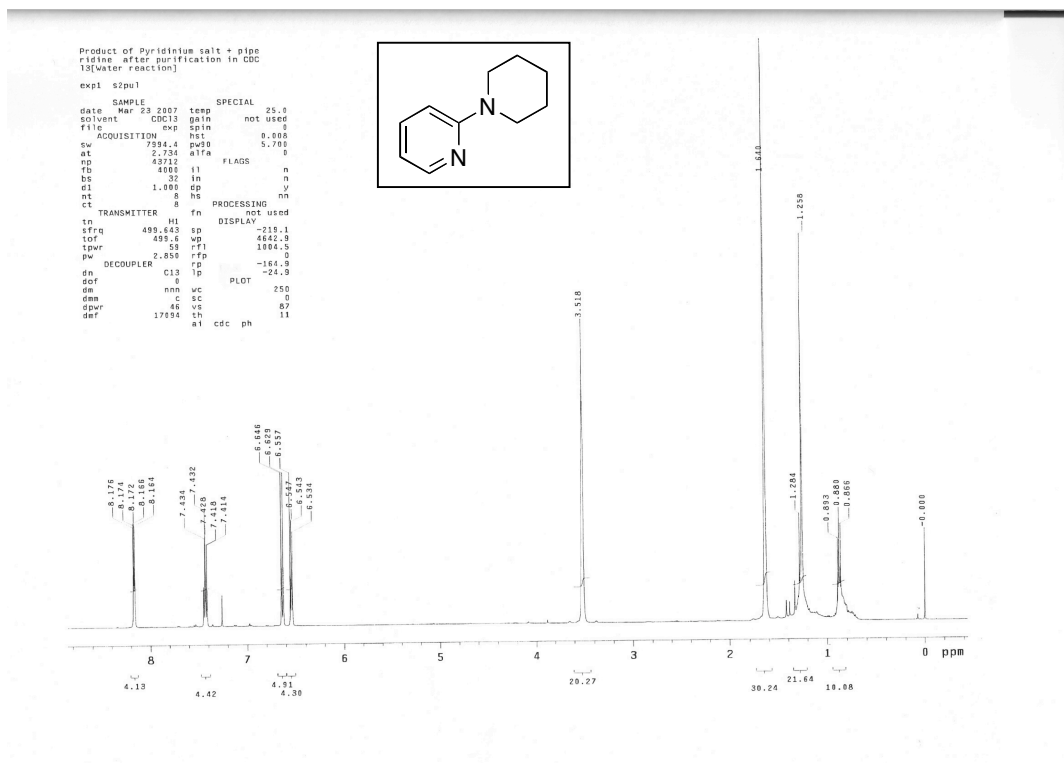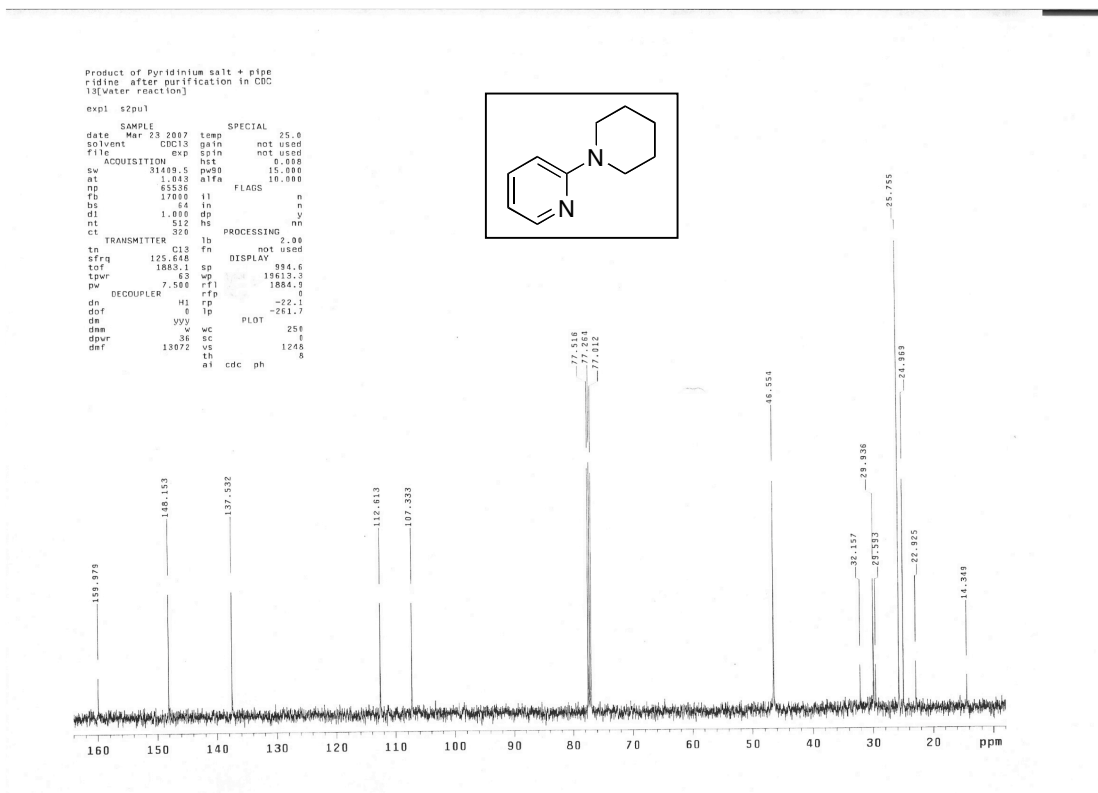

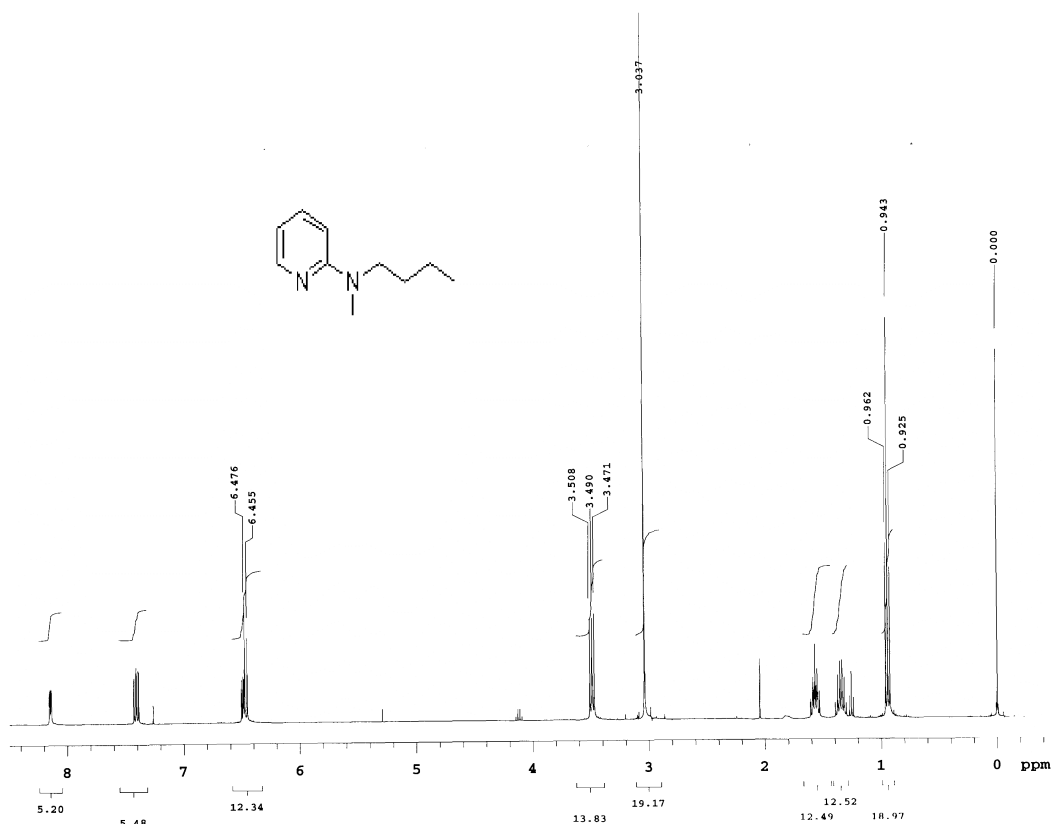

<sup>1</sup>H NMR spectrum of *N*-butyl-*N*-methylpyridin-2-ylamine (**3c**)

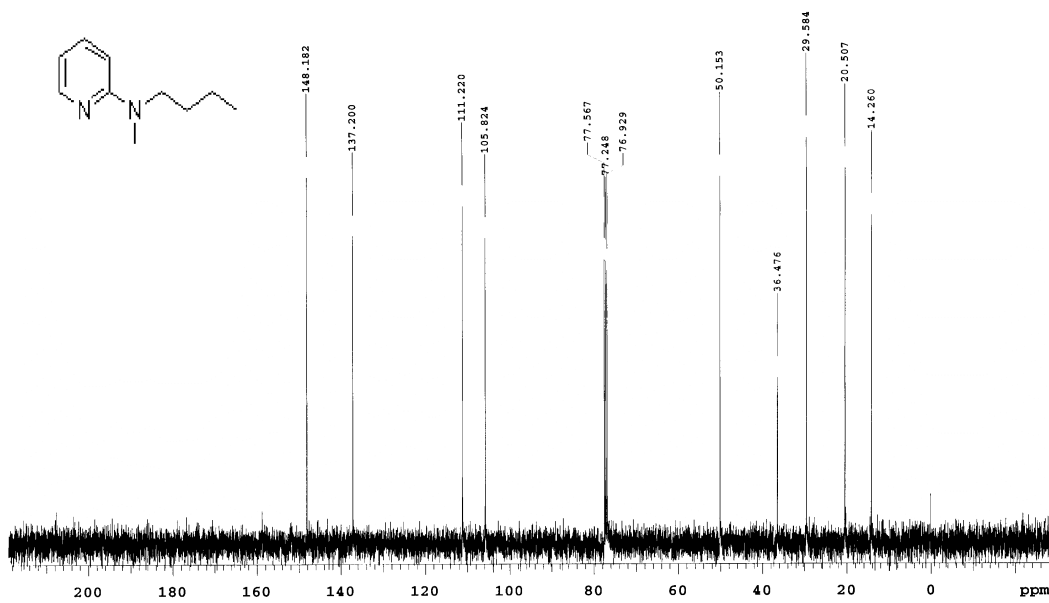

<sup>13</sup>C NMR spectrum of *N*-butyl-*N*-methylpyridin-2-ylamine (**3c**)

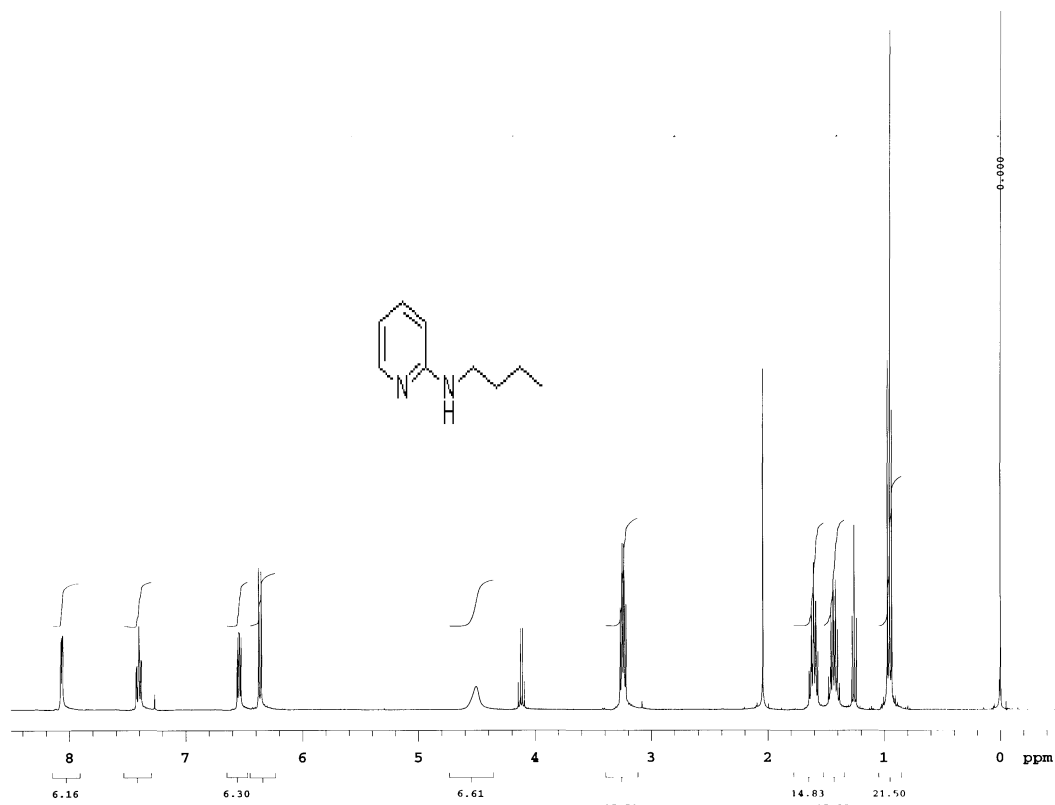

<sup>1</sup>H NMR spectrum of *N*-butyl-pyridin-2-yl-amine (**3d**)

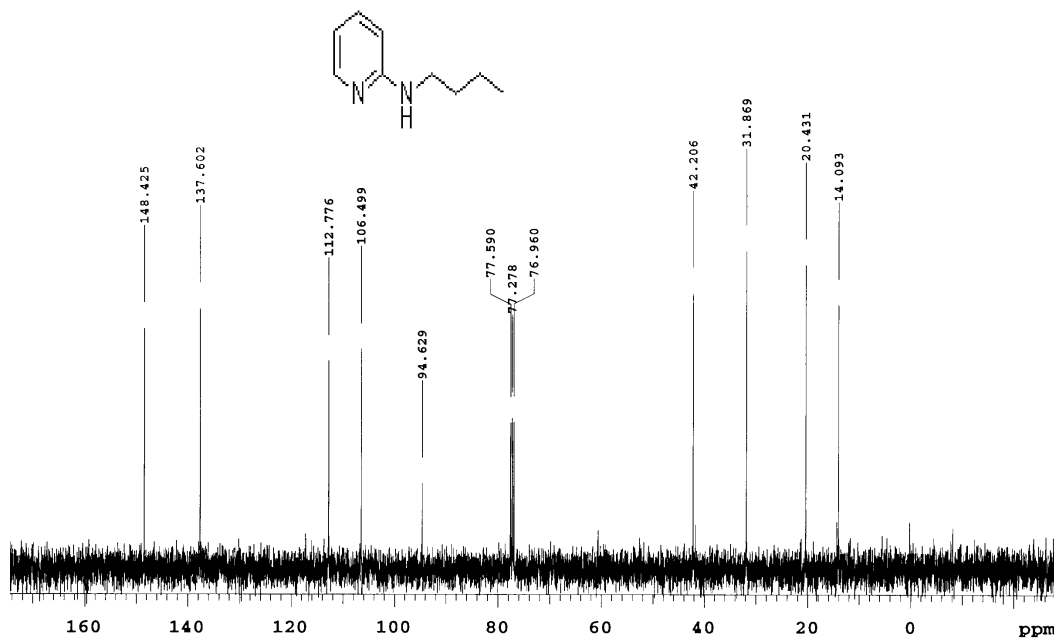

<sup>13</sup>C NMR spectrum of *N*-butyl-pyridin-2-yl-amine (**3d**)

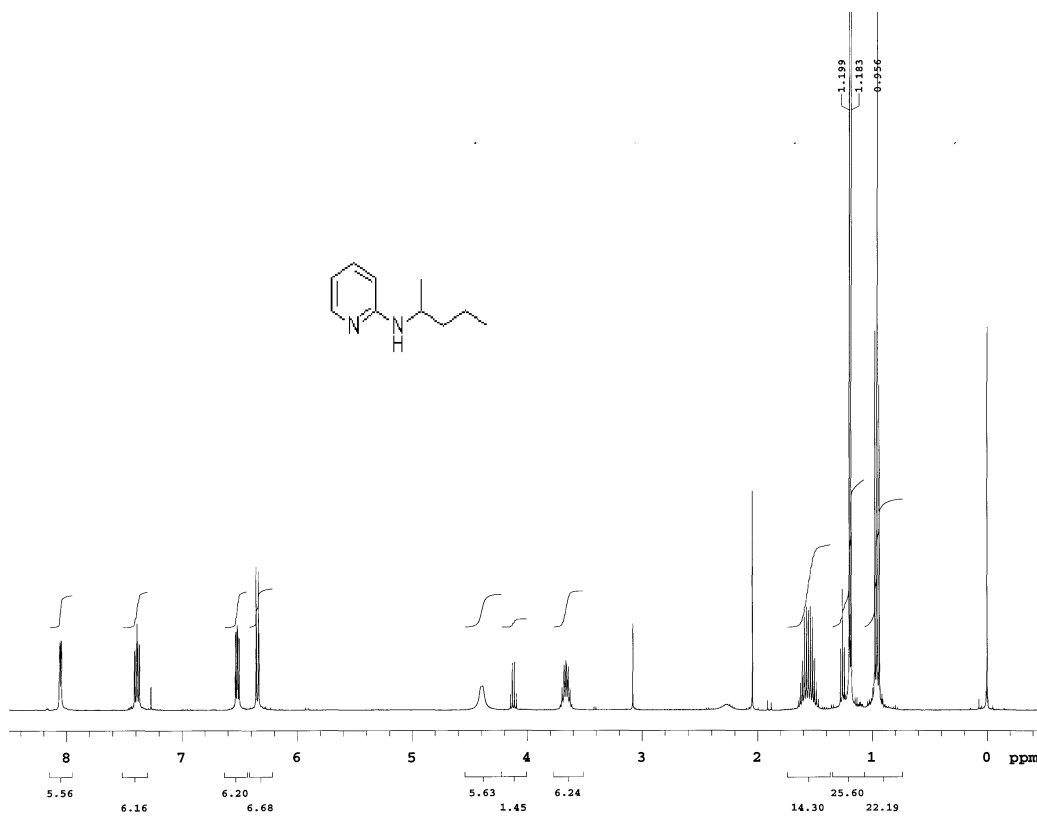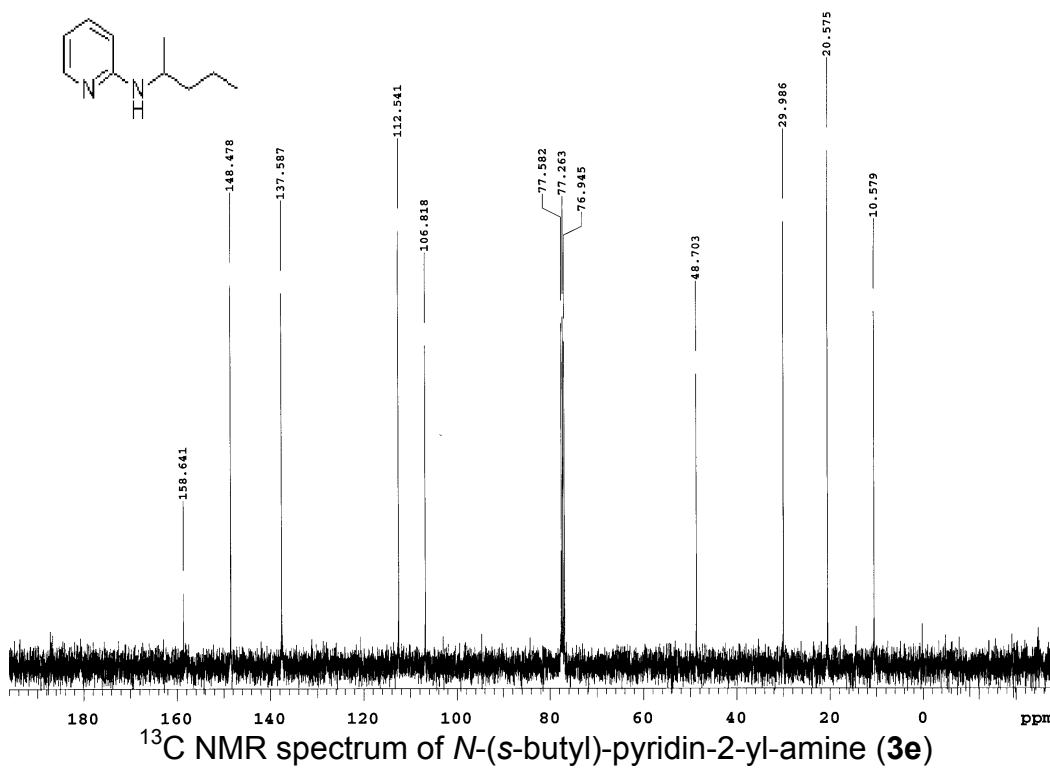



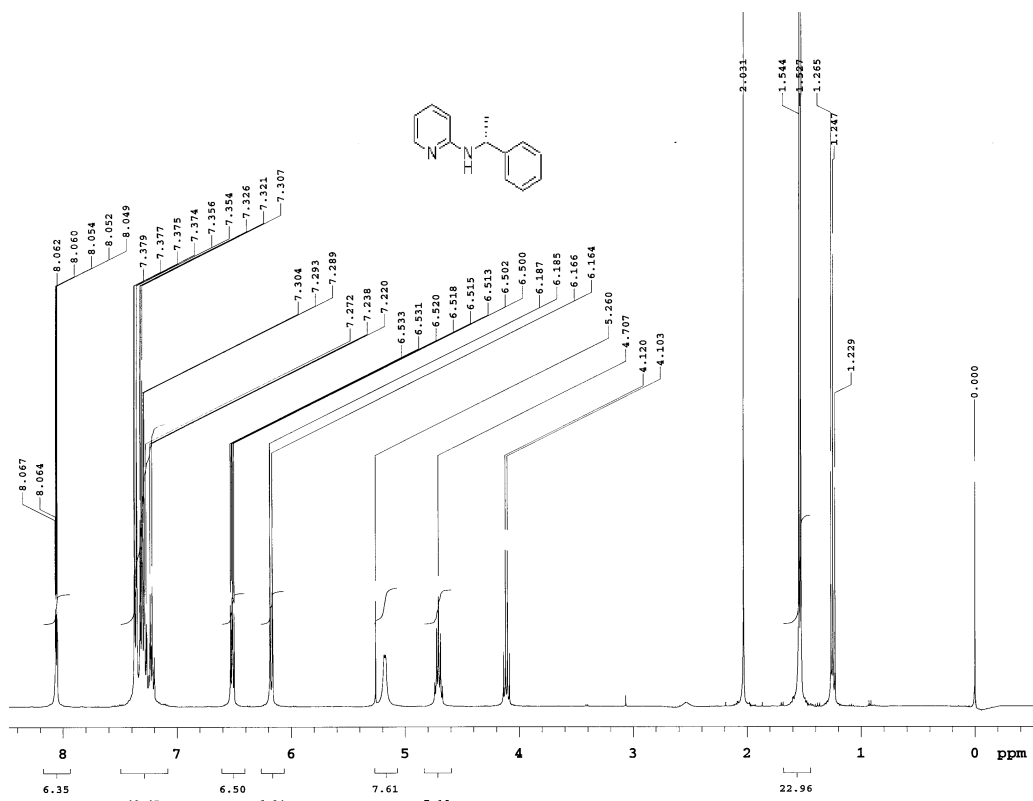

**<sup>1</sup>H NMR spectrum of *N*-(1-phenylethyl)-pyridin-2-yl-amine (3f)**

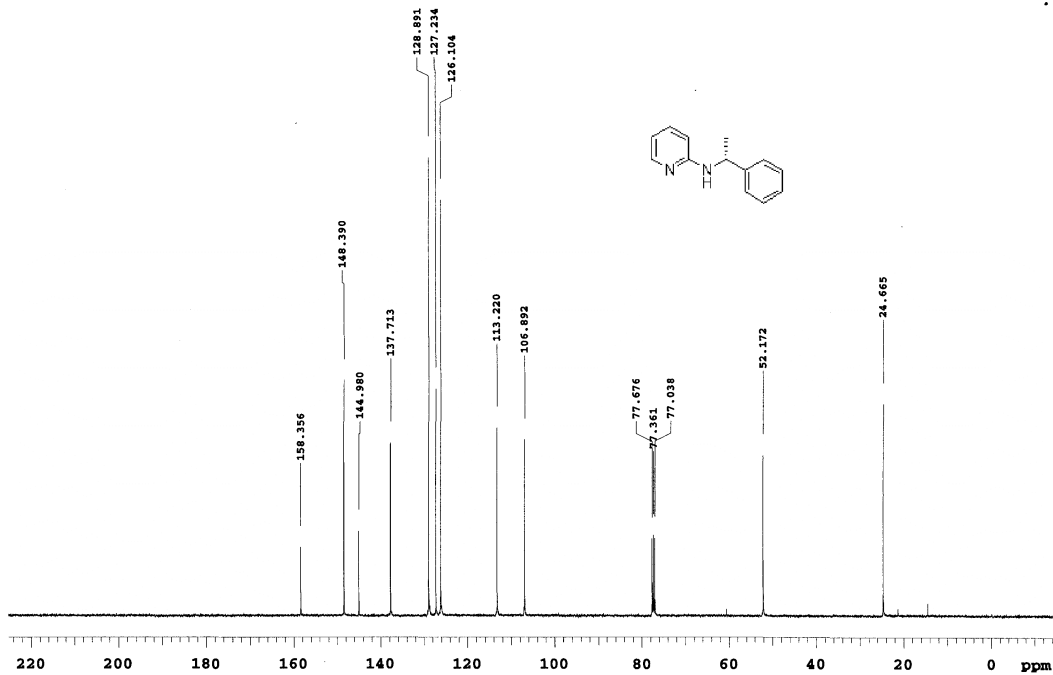

**<sup>13</sup>C NMR spectrum of *N*-(1-phenylethyl)-pyridin-2-yl-amine (3f)**

# $^1\text{H}$ and $^{13}\text{C}$ nmr spectra of **3g**

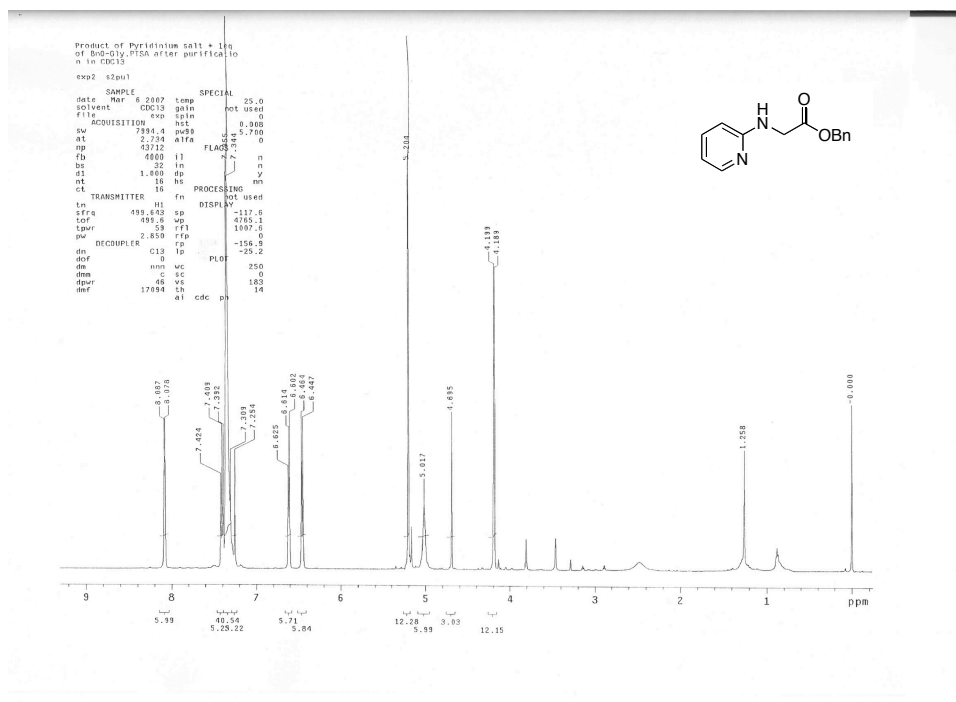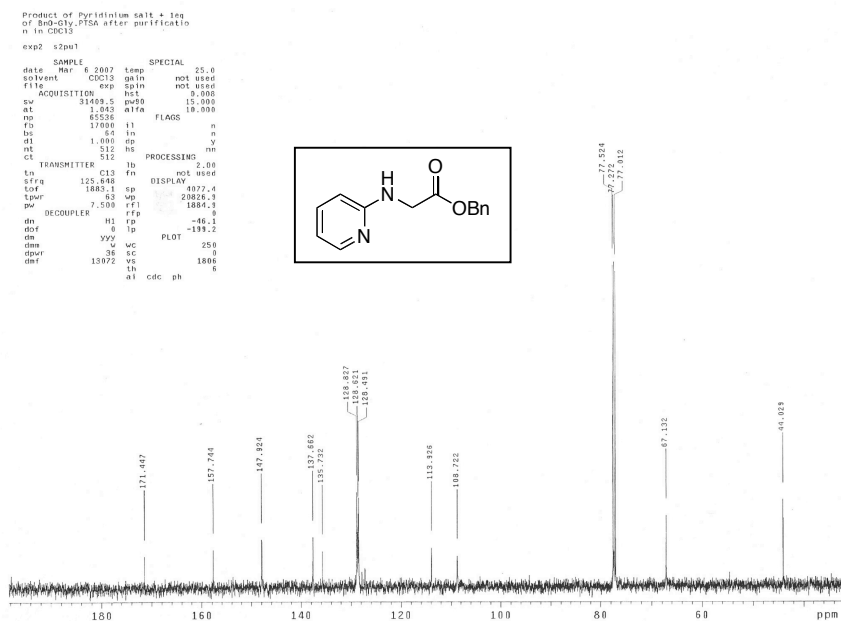

$^1\text{H}$  and  $^{13}\text{C}$  nmr spectra of **3h**

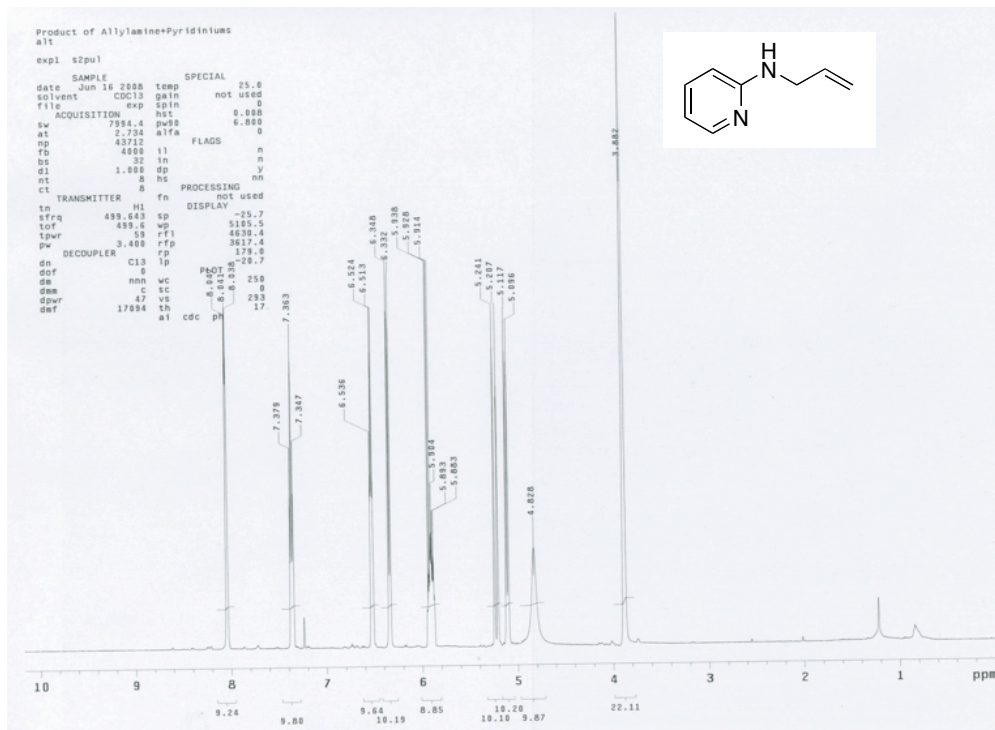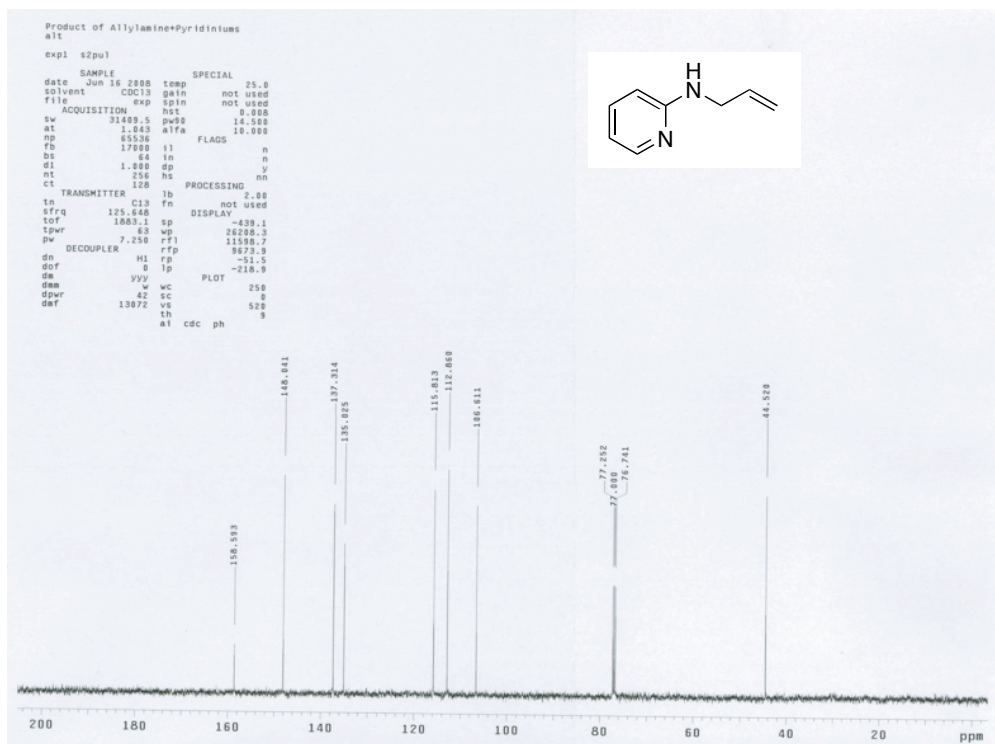

$^1\text{H}$  and  $^{13}\text{C}$  nmr spectra of **3i**

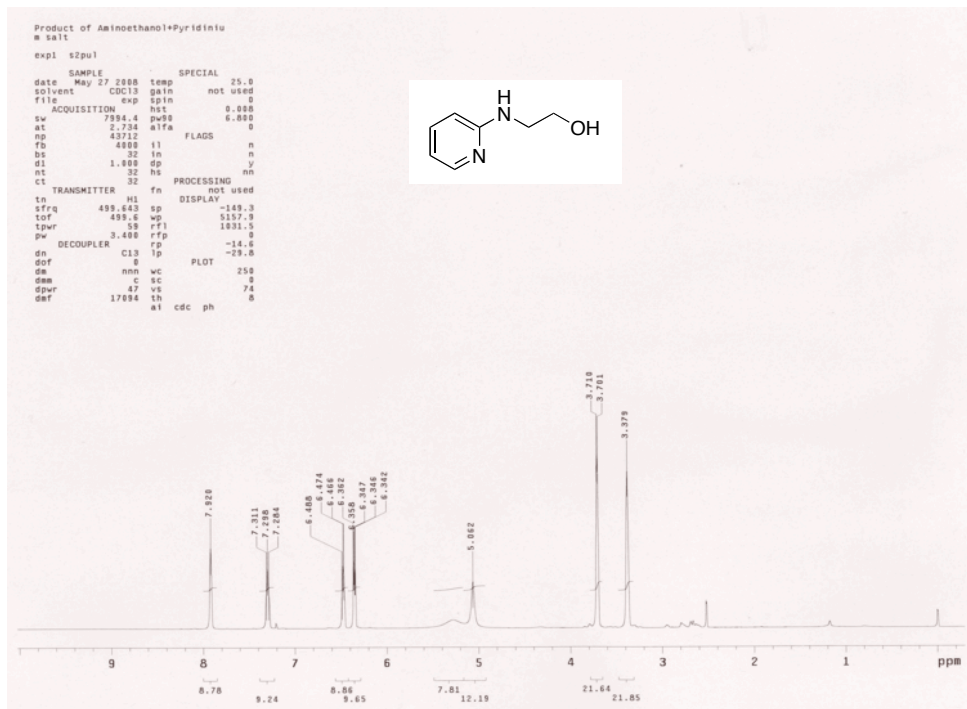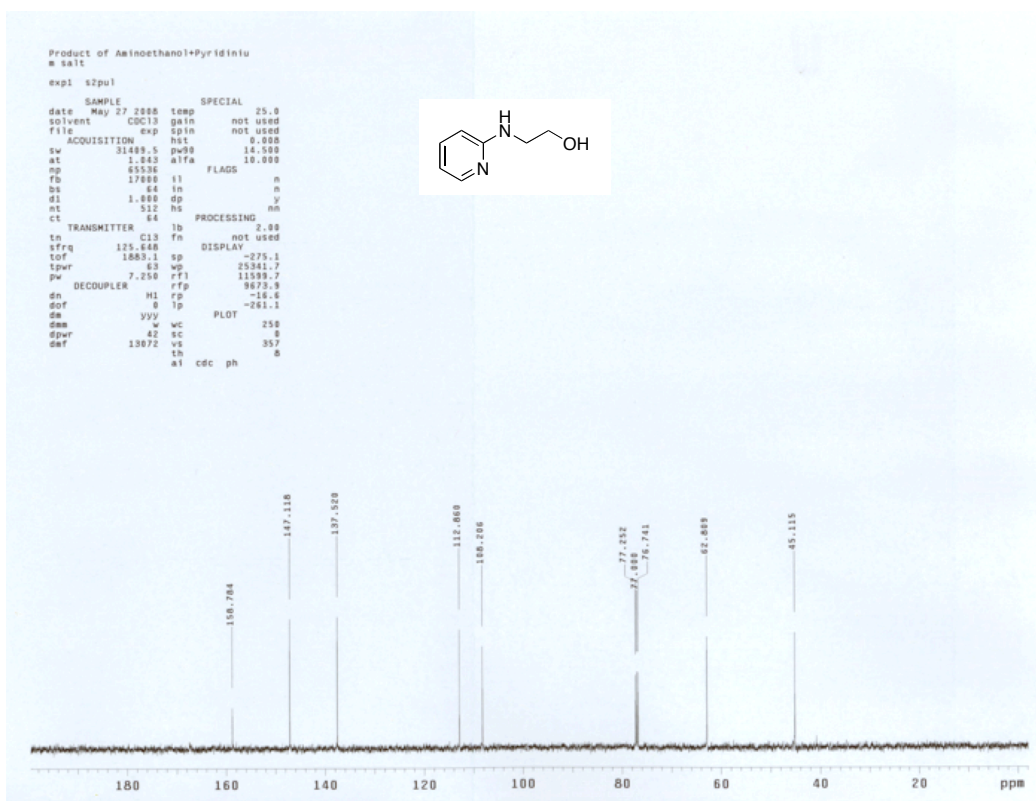



# $^1\text{H}$ and $^{13}\text{C}$ nmr spectra of **3j**

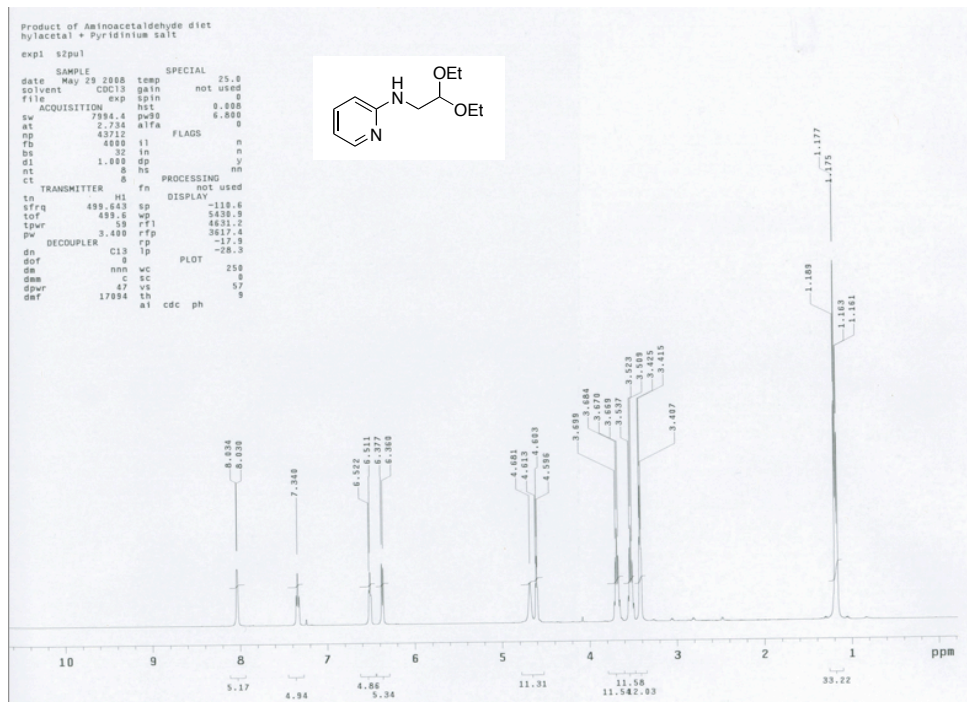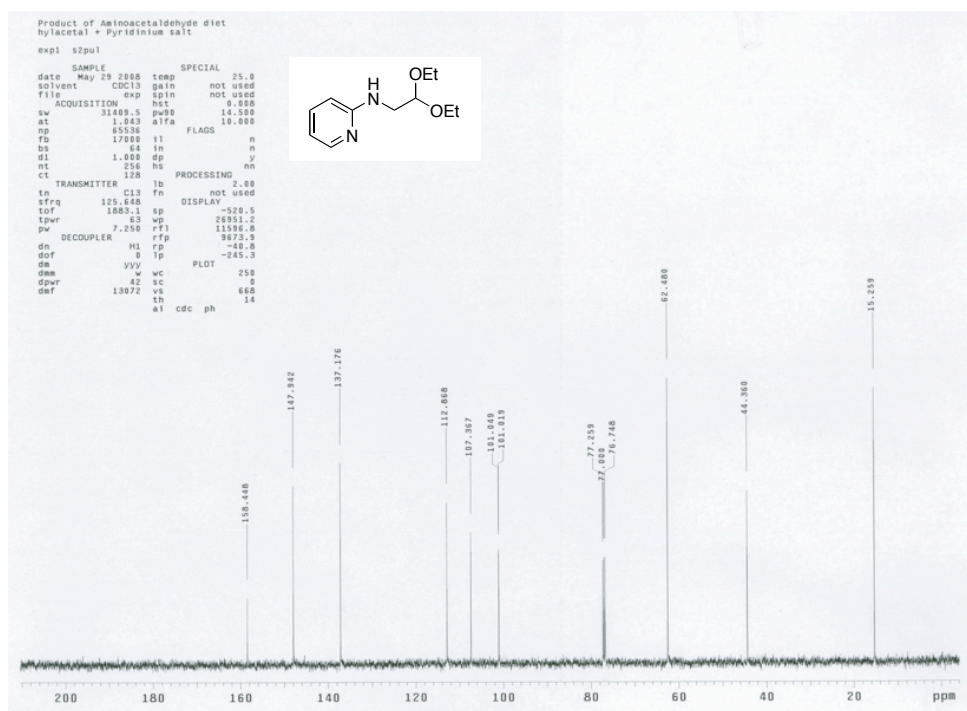

$^1\text{H}$  and  $^{13}\text{C}$  nmr spectra of **3k**

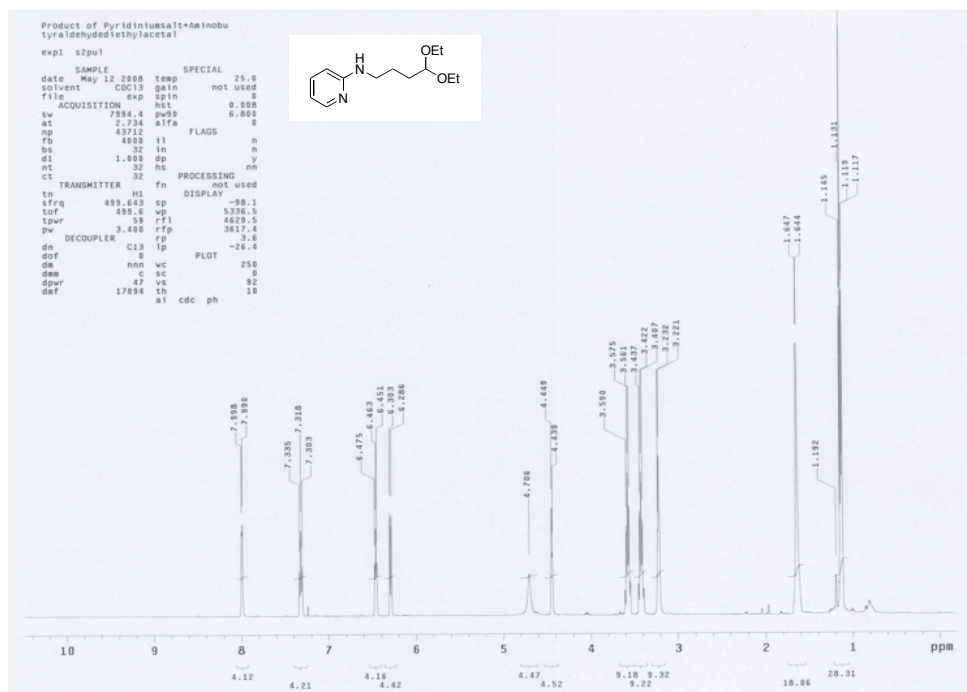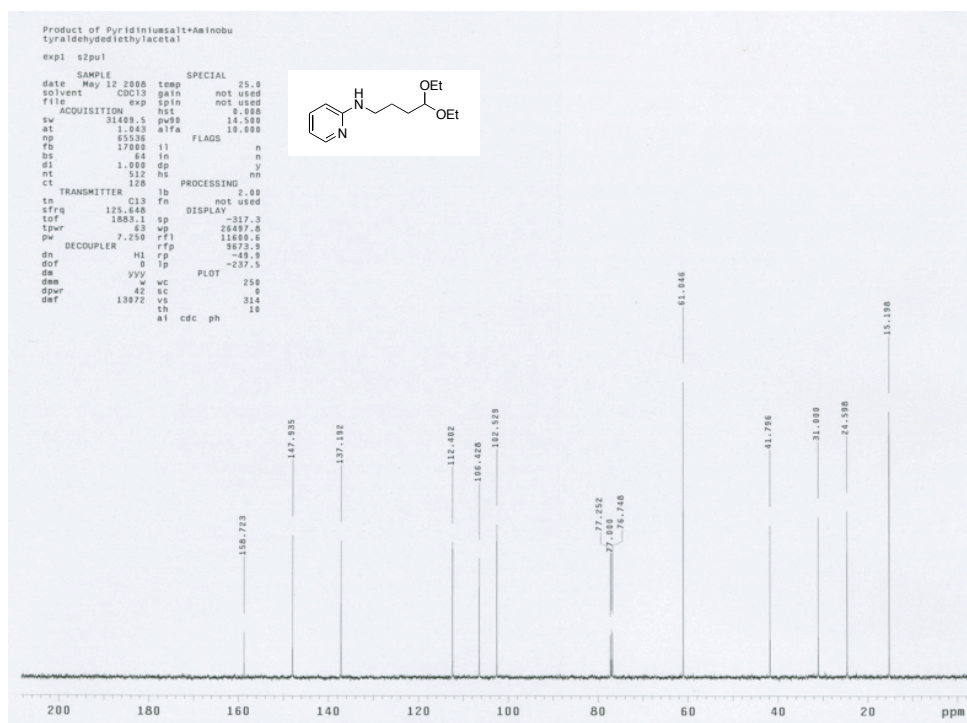

$^1\text{H}$  and  $^{13}\text{C}$  nmr spectra of **5**

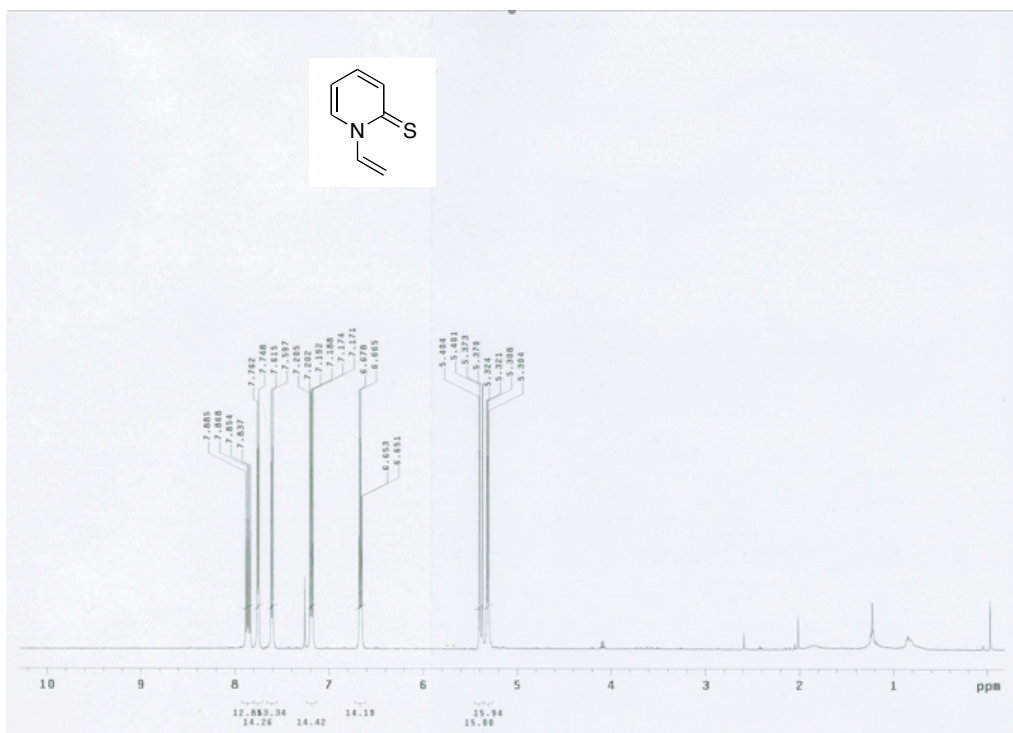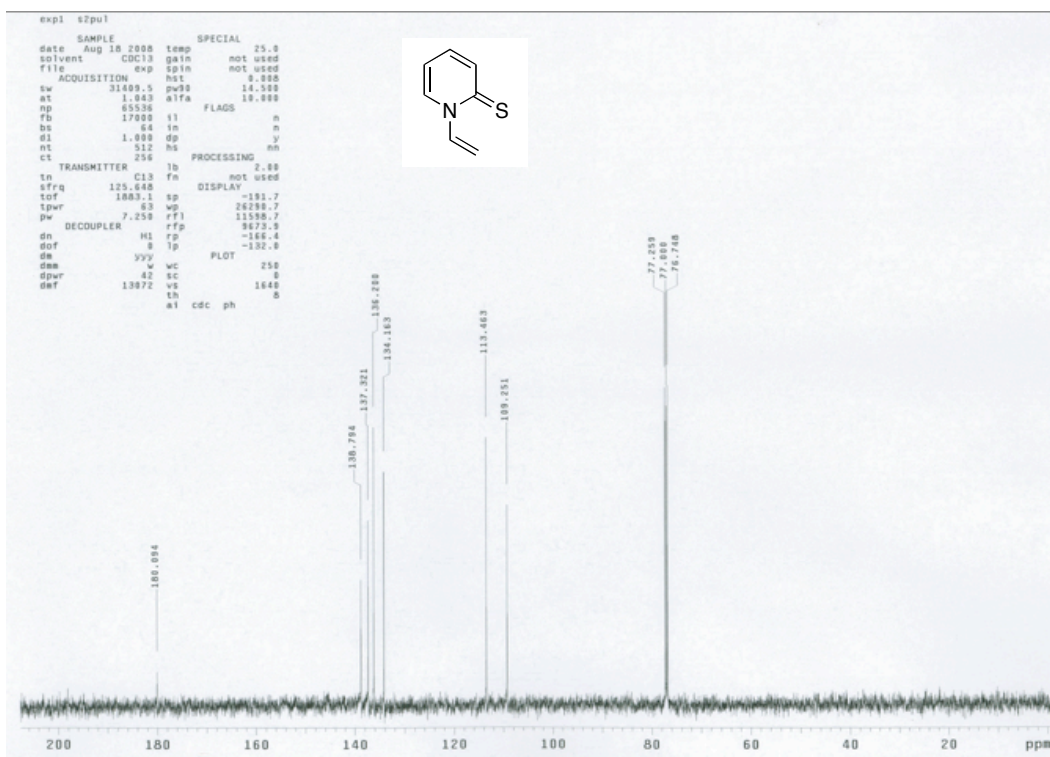



# $^1\text{H}$ and $^{13}\text{C}$ nmr spectra of 7

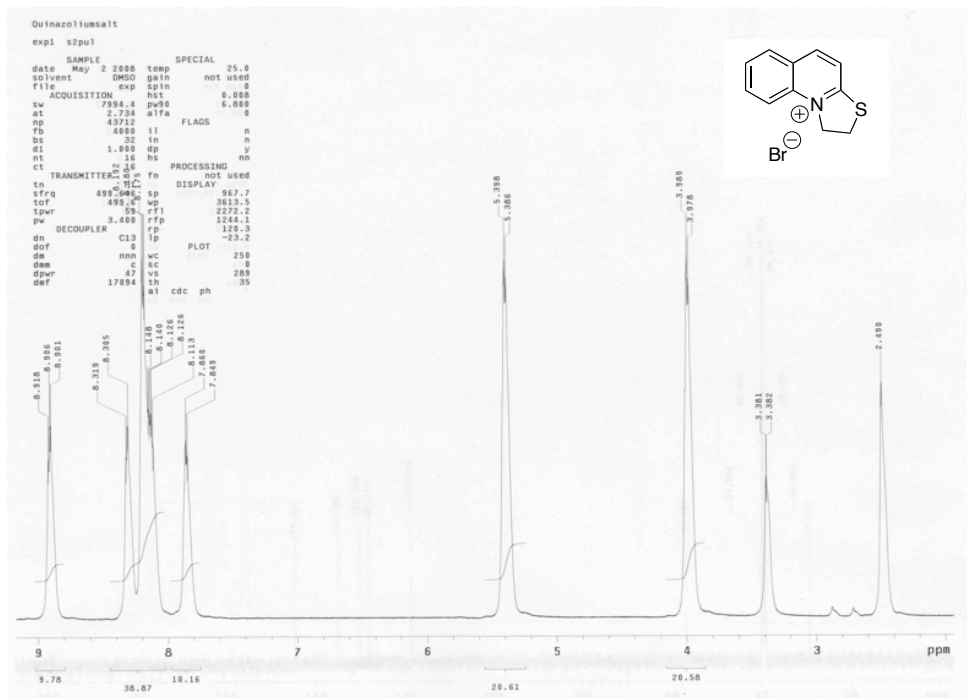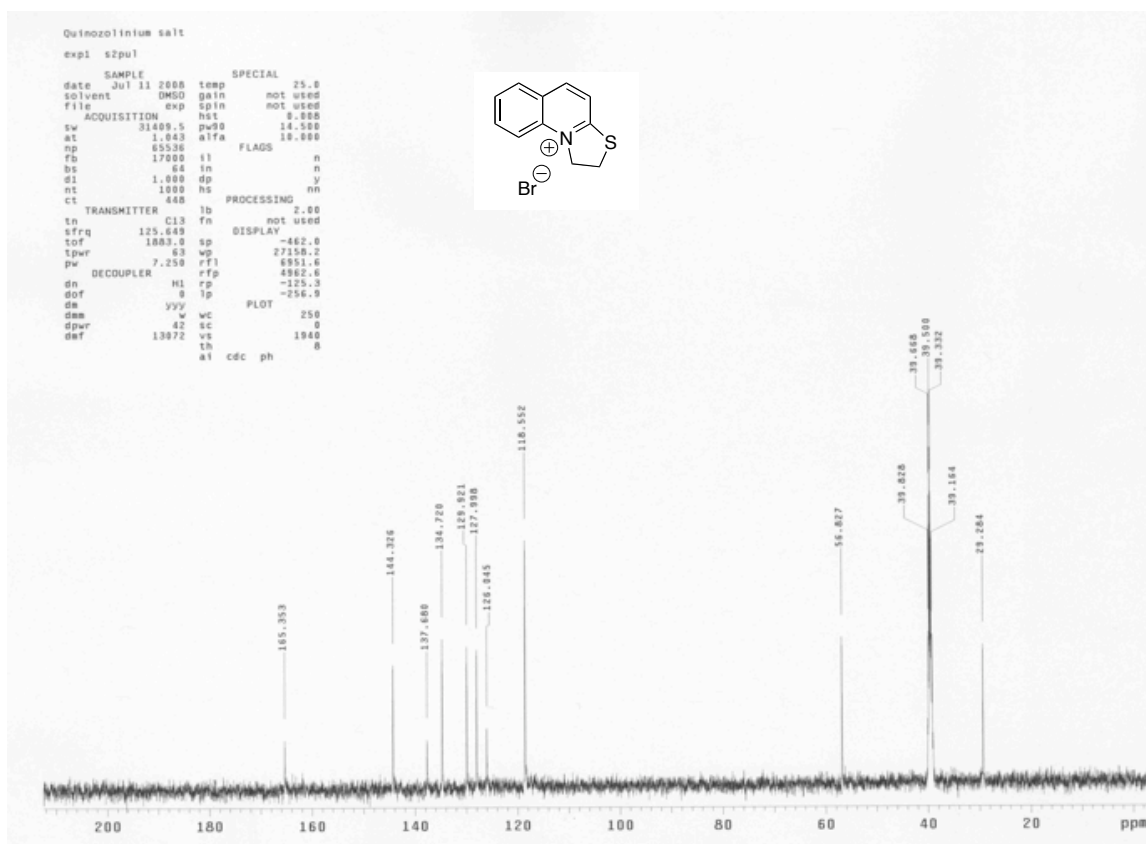



$^1\text{H}$  and  $^{13}\text{C}$  nmr spectra of **8a**

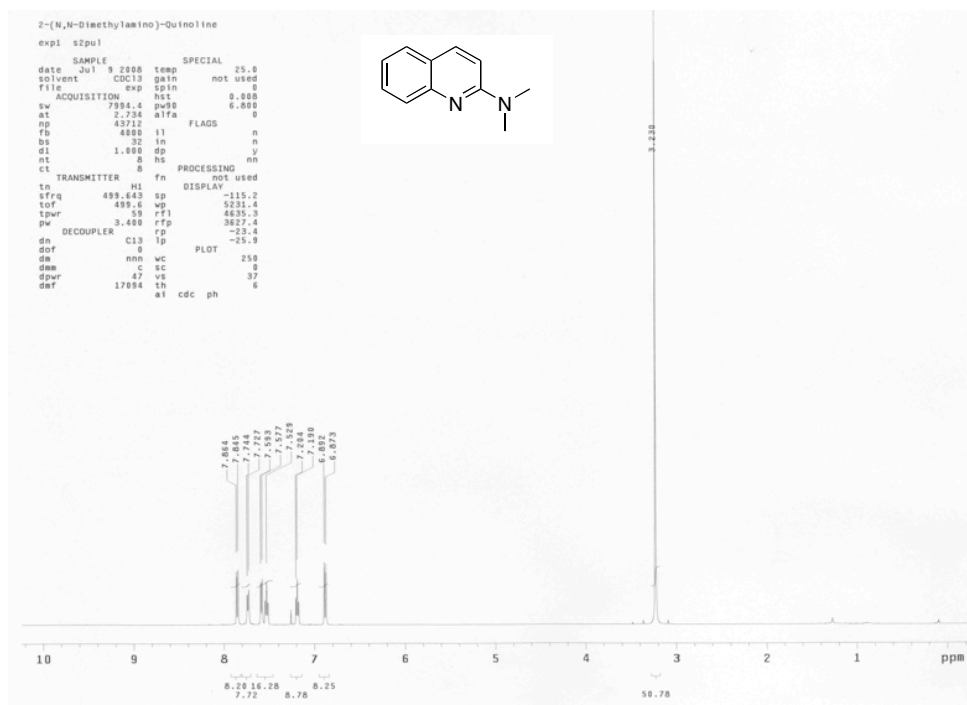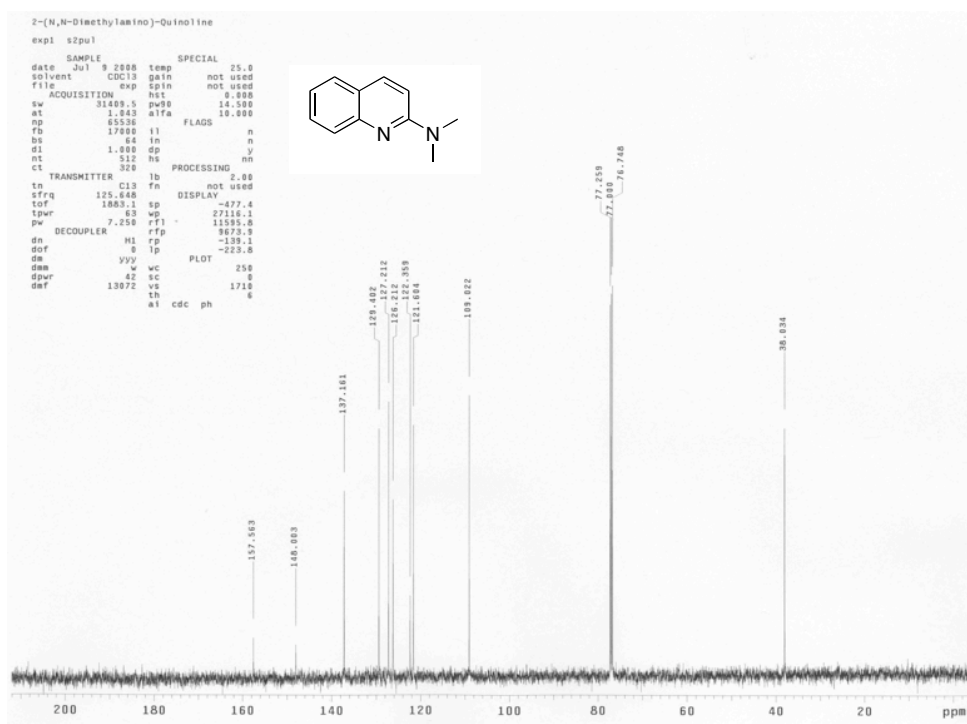

# $^1\text{H}$ and $^{13}\text{C}$ nmr spectra of **8b**

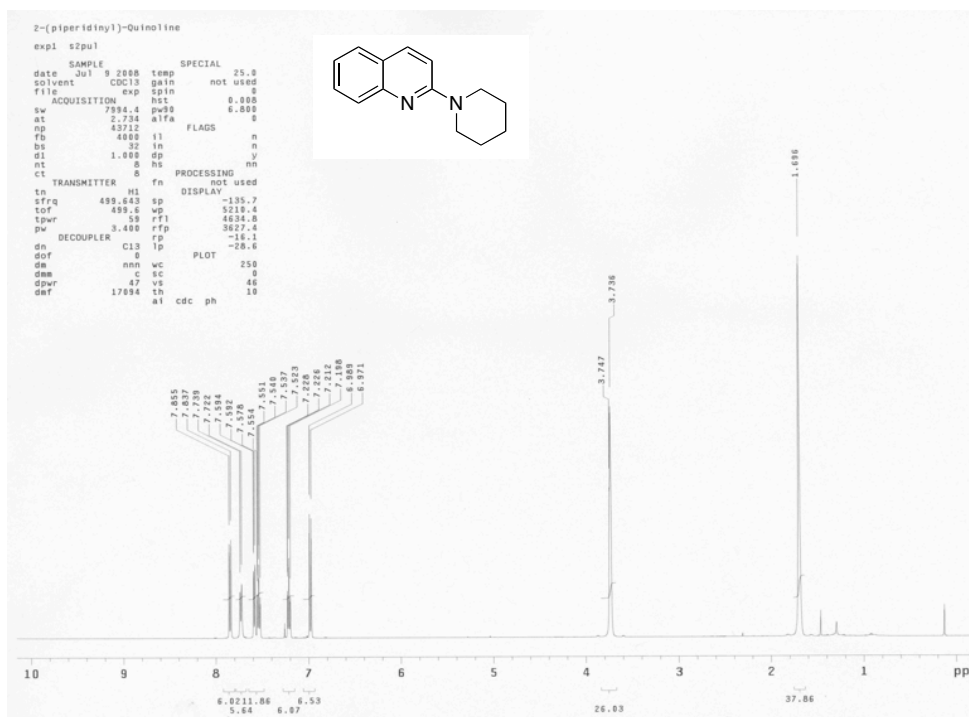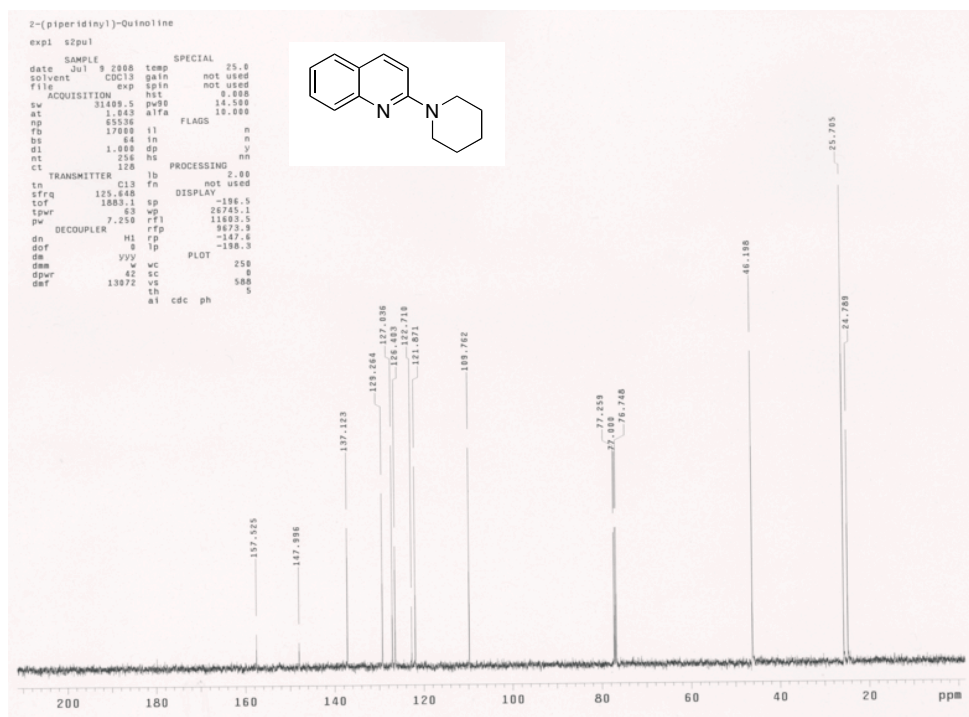

### Monitoring the Formation of 3c by $^1\text{H}$ NMR

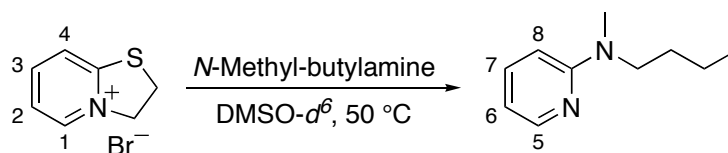

elapsed time of reaction

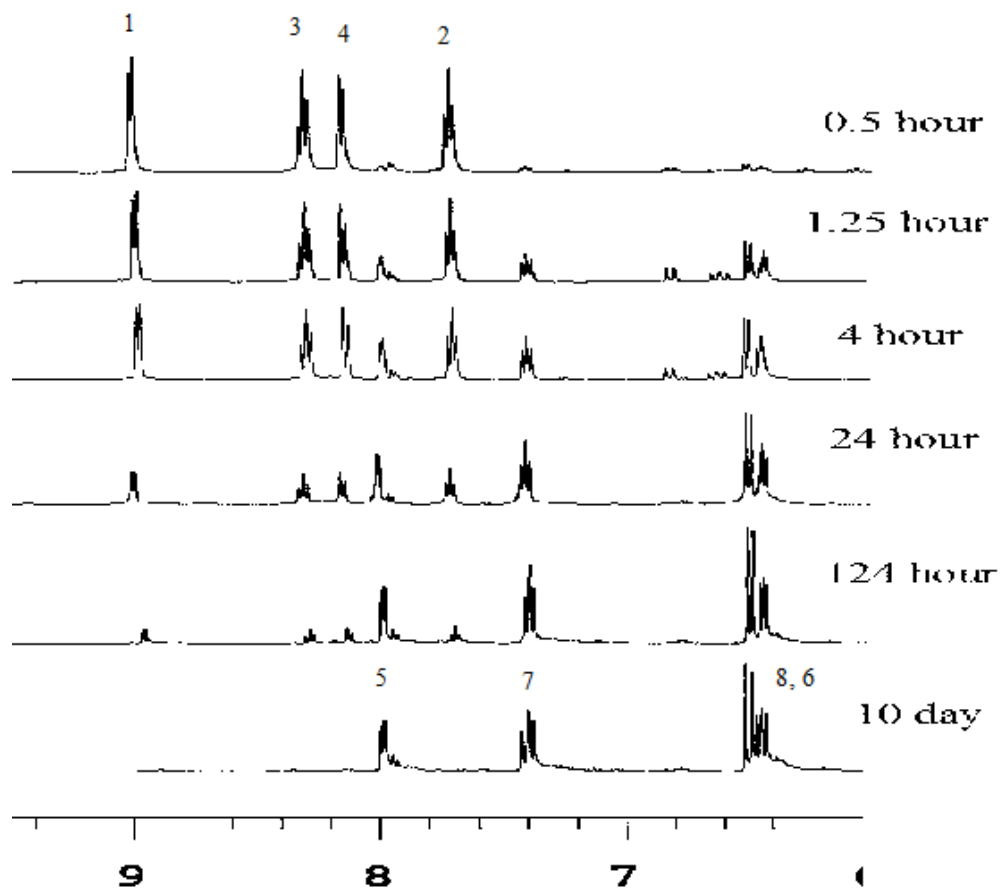

### Comparison of Present Method with Previous Syntheses

| Entry | Amine                                                                               | Conditions <sup>a</sup> | Yield 3 <sup>b</sup> | Prior Syntheses                                                                                                                     |
|-------|-------------------------------------------------------------------------------------|-------------------------|----------------------|-------------------------------------------------------------------------------------------------------------------------------------|
| a     | 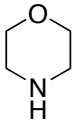   | A                       | 75                   | fr. 2-fluoro-pyridine<br>+ Li-amide, rt (85%) <sup>4</sup><br><br>fr. 2-chloro-pyridine<br>+ Pd cat., 100 °C<br>(99%) <sup>5a</sup> |
|       |                                                                                     | B                       | 78                   |                                                                                                                                     |
|       |                                                                                     | C                       | 94                   |                                                                                                                                     |
| b     |    | A                       | 94                   | fr. 2-fluoro-pyridine<br>+ Li-amide, rt (82%) <sup>4</sup><br><br>fr. 2-chloro-pyridine<br>+ Pd cat., rt (98) <sup>11d</sup>        |
|       |                                                                                     |                         |                      |                                                                                                                                     |
| c     |    | A                       | 78                   | fr. 2-bromo-pyridine<br>160 °C, 40h (76%) <sup>6a</sup>                                                                             |
|       |                                                                                     | B                       | 77                   |                                                                                                                                     |
|       |                                                                                     | C                       | 75                   |                                                                                                                                     |
| d     |  | A                       | 56                   | fr. 2-iodo-pyridine +<br>CuI, CsOAc, 90 °C,<br>(80%) <sup>7</sup><br><br>fr. 2-amino-pyridine<br>(80%) <sup>3f</sup>                |
|       |                                                                                     | B                       | 63                   |                                                                                                                                     |
|       |                                                                                     | C                       | 65                   |                                                                                                                                     |
| e     |  | A                       | 65                   | fr. 2-amino-pyridine<br>(21%) <sup>3b</sup>                                                                                         |
|       |                                                                                     | B                       | 57                   |                                                                                                                                     |
|       |                                                                                     | C                       | 79                   |                                                                                                                                     |
| f     |  | A                       | 75                   | fr. 2-fluoro-pyridine<br>+ Li-amide, rt (64%) <sup>4</sup><br><br>fr. 2-bromo-pyridine<br>+ Pd cat., 90 °C<br>(70%) <sup>6b</sup>   |
|       |                                                                                     | B                       | 59                   |                                                                                                                                     |
|       |                                                                                     | C                       | 61                   |                                                                                                                                     |
| g     |  | A                       | 36                   | not previously<br>prepared                                                                                                          |
|       |                                                                                     | -                       | 48 <sup>c</sup>      |                                                                                                                                     |
| h     |  | A                       | 73                   | fr. 2-fluoropyridine<br>+ MW irradiation,<br>190 °C<br>(64%) <sup>17</sup>                                                          |

|   |                                                                                   |   |    |                                                                            |
|---|-----------------------------------------------------------------------------------|---|----|----------------------------------------------------------------------------|
| i | 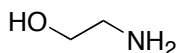 | A | 71 | fr. 2-fluoropyridine<br>+ MW irradiation<br>210 °C<br>(74%) <sup>17</sup>  |
| j |  | A | 86 | fr. 2-aminopyridine<br>+ NaNH <sub>2</sub> , 150 °C<br>(47%) <sup>18</sup> |
| k |  | A | 78 | not previously<br>prepared                                                 |

<sup>a</sup> Reactions analyzed after 48h; A: 4.0 eq. amine, DMSO, 50 °C; B: neat amine (*ca.* 0.4 – 0.5M), rt; C: neat amine (*ca.* 0.4–0.5M), 50 °C. <sup>b</sup> percent, after chromatography. <sup>c</sup> 4.0 eq. amine, DMSO, rt.
